# Supplementary material
Source: MDPI journal article supplement (https://www.mdpi.com/1999-4907/6/11/4328)
Supplement: s1 [file s1]

Supplementary

**Table S1.** Peer-reviewed publications, MSc theses, and PhD theses produced since 2004 with direct links to the restoration of
subtropical thicket.

| **Reference** | **Themes** | | | | | | | |
| --- | --- | --- | --- | --- | --- | --- | --- | --- |
|  | Ecology | Carbon | Restoration | Soil | Economics | Biodiversity | Water | Social Sciences |
| Bekker, C.H. 2013. The influence of soil properties on the growth and distribution of *Portulacaria afra* in subtropical thicket, South Africa. MSc thesis. Nelson Mandela Metropolitan University, Port Elizabeth, South Africa.* |  | X | X | X |  |  |  |  |
| Boogerd, C. 2011. *Portulacaria afra* is constrained under extreme soil conditions in the Fish River Reserve, Eastern Cape, South Africa. South African Journal of Botany 77: 782-786. | X |  |  |  |  |  |  |  |
| Clarke, C.L, Shackleton, S.E. and Powell, M. 2012. Climate change perceptions, drought responses and views on carbon farming amongst commercial livestock and game farmers in the semiarid Great Fish River Valley, Eastern Cape. African Journal of Range & Forage Science 29: 13-23. |  |  |  |  |  |  |  | X |
| Cumming, T. L. 2007. Conservation incentives for private commercial farmers in the thicket biome, Eastern Cape, South Africa. MSc thesis. Rhodes University, Grahamstown, South Africa.* |  |  |  |  | X |  |  | X |
| Curran, P. 2012. Research and development of a preliminary South African voluntary carbon standard for landscape restoration project. MSc Thesis. Rhodes University, Grahamstown, South Africa.* |  | X | X |  | X |  |  |  |
| Knight, A.T. 2008. Towards knowing through doing: improving the societal relevance of systematic conservation assessments. PhD thesis. Nelson Mandela Metropolitan University, Port Elizabeth, South Africa.* |  |  |  |  |  |  |  | X |
| Knight, A.T. and Cowling, R.M. 2011. Towards a true ecology: exploring the implications for conservation of the human and social dimensions of fencing in the subtropical thicket biome, South Africa. In: M.J Somers and M. Hayward (eds), Fencing for conservation: restriction of evolutionary potential or a riposte to threatening processes? Springer, New York. 197-214. |  |  |  |  |  |  |  | X |

**Table S1.** *Cont.*

| **Reference** | **Themes** | | | | | | | |
| --- | --- | --- | --- | --- | --- | --- | --- | --- |
|  | Ecology | Carbon | Restoration | Soil | Economics | Biodiversity | Water | Social Sciences |
| Kota, Z. and Shackleton, S.E. 2014. Harnessing local ecological knowledge to identify priotiry species for restoration of the Albany Thicket, South Africa. Forests, Trees and Livelihoods24: 43-58 |  |  |  |  |  |  |  | X |
| Lechmere-Oertel, R.G. 2003. The effects of goat browsing on ecosystem patterns and processes in succulent thicket, South Africa. PhD thesis. University of Port Elizabeth, Port Elizabeth, South Africa. * | X | X | X | X |  | X | X |  |
| Lechmere-Oertel, R.G., Kerley, G.I.H. and Cowling, R.M. 2005. Landscape dysfunction and reduced spatial heterogeneity in soil resources and fertility in semi-arid succulent thicket, South Africa. Austral Ecology 30: 615-624. | X |  | X | X |  | X |  |  |
| Lechmere-Oertel, R.G., Kerley, G.I.H. and Cowling, R.M. 2005. Patterns and implications of transformation in semi-arid succulent thicket, South Africa. Journal of Arid Environments 62: 459-474. | X |  | X |  |  | X |  |  |
| Lechmere-Oertel, R.G., Kerley, G.I.H., Mills, A.J. and Cowling, R.M. 2008. Litter dynamics across browsing-induced fence line contrasts in succulent thicket, South Africa. South African Journal of Botany 74: 651-659. | X |  |  | X |  |  |  |  |
| Marais, F. 2004.Considerations for implementing market-based mechanisms in combating climate change in South Africa. MCom. thesis. Rhodes University, Grahamstown, South Africa.* |  | X |  |  | X |  |  |  |
| Mchunu, S.E. 2012. Distribution and Stability of Soil Carbon in Spekboom Thicket, Eastern Cape, South Africa. MSc Thesis. University of Stellenbosch, Stellenbosch, South Africa.* |  | X |  | X |  |  |  |  |

**Table S1.** *Cont.*

| **Reference** | **Themes** | | | | | | | |
| --- | --- | --- | --- | --- | --- | --- | --- | --- |
|  | Ecology | Carbon | Restoration | Soil | Economics | Biodiversity | Water | Social Sciences |
| Mills, A.J., and Cowling, R.M. 2014. How fast can carbon be sequestered when restoring degraded subtropical thicket? Restoration Ecology 22: 571-573. |  | X | X |  |  |  |  |  |
| Mills, A.J. and Cowling, R.M. 2010. Below-ground carbon stocks in intact and transformed subtropical thicket landscapes in semi-arid South Africa. Journal of Arid Environments 74: 93-100. | X | X | X | X |  |  |  |  |
| Mills, A.J. and Cowling, R.M. 2006. Rate of carbon sequestration at two thicket restoration sites in the Eastern Cape, South Africa. Restoration Ecology 14: 38-49. | X | X | X | X |  |  |  |  |
| Mills, A.J., Cowling, R.M., Fey, M.V., Kerley, G.I.H., Lechmere-Oertel, R.G., Sigwela, A., Skowno, A. & Rundel, P.W. 2005. Effects of goat pastoralism on ecosystem carbon storage in semi-arid thicket, Eastern Cape, South Africa. Austral Ecology 30: 807-813. | X | X | X | X |  |  |  |  |
| Mills, A.J., Cowling, R.M., Steyn, D., Spekreijse, J., Van den Broeck, D., Weel, S. and Boogerd, C. 2011. *Portulacaria afra* is constrained under extreme soil conditions in the Fish River Reserve, Eastern Cape, South Africa. South African Journal of Botany 77: 782-786. | X |  |  | X |  |  |  |  |
| Mills, A.J. and Fey, M.V. 2003. Declining soil quality in South Africa: effects of land use on soil organic matter and surface crusting. South African Journal of Science 99: 429-436. |  | X | X | X |  |  |  |  |
| Mills, A.J. and Fey, M.V. 2004. Soil carbon and nitrogen in five contrasting biomes of South Africa exposed to different land uses. South African Journal of Soil Science 21: 94-103. |  | X |  | X |  |  |  |  |

**Table S1.** *Cont.*

| **Reference** | **Themes** | | | | | | | |
| --- | --- | --- | --- | --- | --- | --- | --- | --- |
|  | Ecology | Carbon | Restoration | Soil | Economics | Biodiversity | Water | Social Sciences |
| Mills, A.J., Spear, D., Ndhlovu, T., Knight, M.H., Pienke, D.M., Hofmeyr, S. and Cowling, R.M. 2014. Biomass of large herbivores in South African subtropical thicket. African Journal of Ecology 52:577-580. | X |  |  |  |  |  |  |  |
| Mills, A.J., Turpie, J., Cowling, R.M., Marais, C., Kerley, G.I.H., Lechmere-Oertel, R.G., Sigwela, A.M. and Powell, M. 2007. Assessing costs, benefits and feasibility of subtropical thicket restoration in the Eastern Cape, South Africa. In: J.Aronson, S.J. Milton and J. Blignaut (eds), Restoring natural capital. Science, business and practice. Island Press, Washington DC. 179-187. | X | X | X | X | X | X | X | X |
| Powell, M.J. 2009. Restoration of degraded subtropical thickets in the Baviaanskloof Megareserve, South Africa: The role of carbon stocks and *Portuclacaria afra* survivorship. MSc thesis. Rhodes University, Grahamstown, South Africa. * |  | X | X | X |  |  |  |  |
| Sigwela, A. M. 2004. Animal seed interactions in the thicket biome: consequence of fuanal replacements and land use for seed dynamics. MSc Thesis. University of Port Elizabeth, Port Elizabeth, South Africa.* | X |  |  |  |  | X |  |  |
| Sigwela, A. M. 2004. The impacts of landuse on vertebrate diversity and vertebrate-mediated processes in the Thicket Biome, Eastern Cape. PhD thesis. University of Port Elizabeth, Port Elizabeth, South Africa.* | X |  |  |  |  | X |  |  |
| Sigwela, A.M., Kerley, G.I.H., Mills, A.J. and Cowling, R.M. 2009. The impact of browsing-induced degradation on the reproduction of subtropical thicket canopy shrubs and trees. South African Journal of Botany 75: 262-267. | X |  | X |  |  |  |  |  |
| Van der Vyver, M.L., Cowling, R.M., Campbell, E.E. and Difford, M. 2012. Active restoration of woody canopy dominants in degraded South African semi-arid thicket is neither ecologically nor economically feasible. Applied Vegetation Science 15: 26-34. |  |  | X |  | X |  |  |  |

**Table S1.** *Cont.*

| **Reference** | **Themes** | | | | | | | |
| --- | --- | --- | --- | --- | --- | --- | --- | --- |
|  | Ecology | Carbon | Restoration | Soil | Economics | Biodiversity | Water | Social Sciences |
| Van der Vyver, M. L. 2011. Restoring the biodiversity of canopy species within degraded spekboom thicket. MSc thesis. Nelson Mandela Metropolitan University. * | X | X | X | X |  | X |  |  |
| Van der Vyver, M.L., Cowling, R.M, Mills, A.J. and Difford, M. 2012. Spontaneous return of biodiversity in restored subtropical thicket: *Portulacaria afra* as an ecosystem engineer. Restoration Ecology 21: 736–744 | X | X | X | X |  | X |  |  |
| Van Luijk, G., Cowling, R.M., Riksen, M.J.P.M. and Glenday, J. 2013. Hydrological implications of desertification: Degradation of South African semi-arid subtropical thicket. Journal of Arid Environments 91: 14-21. |  |  |  | X |  |  | X |  |
| Weatherall-Thomas, C. R. 2009. Seed dynamics and seedling survival in mainland thicket of the Eastern Cape. MSc thesis. Nelson Mandela Metropolitan University.* | X |  | X |  |  |  |  |  |

* Theses.
